# Supplementary material for: Oxygen as a Possible Technological Adjuvant during the Crushing or the Malaxation Steps, or Both, for the Modulation of the Characteristics of Extra Virgin Olive Oil
Source: MDPI journal article supplement (doi:10.3390/foods12112170), 2023-05-27
Supplement: s1 [file s1]

Tabla S1. Metabolites identified at different level according to their chemical group.

| Metabolite                        | Group label     | Level |
|-----------------------------------|-----------------|-------|
| 3-Methyl-furan                    | Furan           | 2     |
| 3-Methyl-butanal                  | Aldehyde no LOX | 1     |
| 2-Methyl-butanal                  | Aldehyde no LOX | 1     |
| Octanal                           | Aldehyde no LOX | 1     |
| Nonanal                           | Aldehyde no LOX | 1     |
| (E,E)-2,4-Hexadienal              | Aldehyde no LOX | 1     |
| Benzaldehyde                      | Aldehyde no LOX | 1     |
| (Z)-2-Heptenal                    | Aldehyde no LOX | 1     |
| Methanol                          | Alcohol no LOX  | 1     |
| Ethanol                           | Alcohol no LOX  | 1     |
| (Z)-2-Hepten-1-ol                 | Alcohol no LOX  | 2     |
| Benzyl alcohol                    | Alcohol no LOX  | 1     |
| 4-Methyl-2-pentanone              | Ketone no LOX   | 2     |
| 6-Methyl-5-hepten-2-one           | Ketone no LOX   | 1     |
| 2-Octanone                        | Ketone no LOX   | 2     |
| Ethyl butyrate                    | Ester no LOX    | 2     |
| Butyl acetate                     | Ester no LOX    | 2     |
| Ethyl isovalerate                 | Ester no LOX    | 2     |
| Toluene                           | HC aromatic     | 2     |
| Ethylbenzene                      | HC aromatic     | 1     |
| $\alpha$ -Ocimene                 | HC-monoterpene  | 1     |
| (E)-4,8-Dimethylnona-1,3,7-triene | HC-terpene      | 2     |
| UK-1                              | UK-1            | 4     |
| UK-2                              | UK-2            | 4     |
| Hexanal                           | Aldehyde LOX    | 1     |
| (Z)-2-Pentenal                    | Aldehyde LOX    | 1     |
| (E)-2-Pentenal                    | Aldehyde LOX    | 1     |
| (Z)-3-Hexenal                     | Aldehyde LOX    | 1     |
| (E)-3-Hexenal                     | Aldehyde LOX    | 1     |
| (Z)-2-Hexenal                     | Aldehyde LOX    | 1     |
| (E)-2-Hexenal                     | Aldehyde LOX    | 1     |
| 1-Penten-3-ol                     | Alcohol LOX     | 1     |
| 1-Hexanol                         | Alcohol LOX     | 1     |
| (Z)-3-Hexen-1-ol                  | Alcohol LOX     | 1     |
| Hexyl acetate                     | Ester LOX       | 1     |

|                              |                   |   |
|------------------------------|-------------------|---|
| <b>(Z)-3-Hexenyl acetate</b> | Ester LOX         | 1 |
|                              |                   |   |
| <b>Pentene dimers</b>        | LOX hydrocarbon   | 2 |
| <b>2-Pentanone</b>           | Ketone LOX        | 1 |
| <b>3-Pentanone</b>           | Ketone LOX        | 1 |
| <b>1-Penten-3-one</b>        | Ketone LOX        | 1 |
|                              |                   |   |
| <b>4-Methyl-2-pentanol</b>   | Internal Standard | 1 |
